# Supplementary material for: Boosted photoredox capability of visible light-active P-doped C3N4 with efficient harvesting of electron–hole pairs
Source: Royal Society of Chemistry journal article supplement (doi:10.1039/d4se00826j), 2024-01-01
Supplement: d4se00826j1.pdf [file d4se00826j1.pdf]

## Electronic Supplementary Information

### **Boosted photoredox capability of visible-active P-doped C<sub>3</sub>N<sub>4</sub> with efficient harvesting of electron-hole pairs**

Asmita Dileep Gaonkar,<sup>a</sup> Shraddha Paniya,<sup>a</sup> Srinivasu Kancharlapalli,<sup>b,c</sup> and Kiran Vankayala<sup>a,\*</sup>

<sup>a</sup> Functional Materials for Electrochemistry and Solar energy (FunMatES) Group, Energy and Environmental Chemistry Lab, Department of Chemistry, Birla Institute of Technology and Science (BITS), Pilani, K K Birla Goa Campus, Goa, 403726.

\*Email: kiranv@goa.bits-pilani.ac.in; kiran2cu@gmail.com

<sup>b</sup> Chemistry Division, Bhabha Atomic Research Centre, Mumbai, India, Homi Bhabha National Institute, Anushaktinagar, Mumbai, India

<sup>c</sup> Homi Bhabha National Institute, Anushaktinagar, Mumbai, India



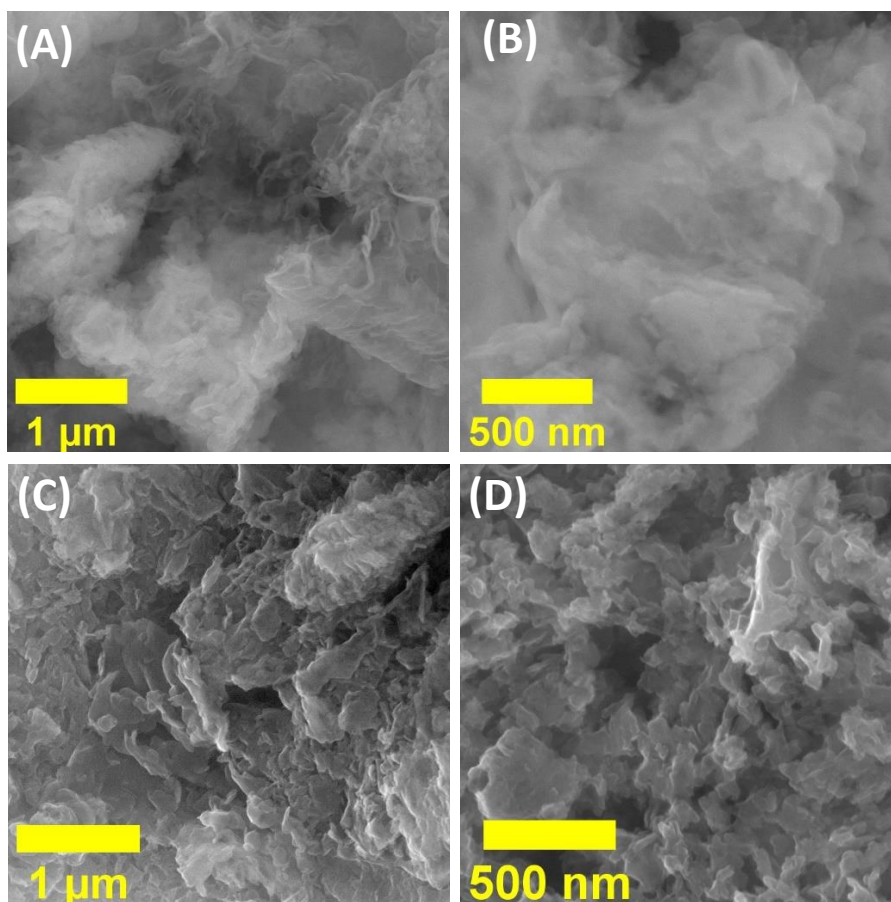

Fig. S1. FESEM images of CN-105P (A & B) and CN-315P (C & D) recorded under different magnifications.

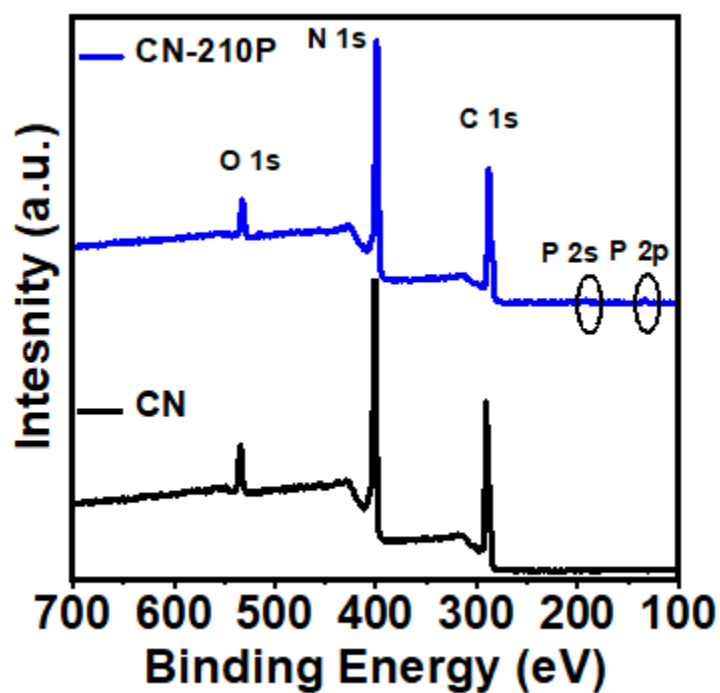

Fig. S2. XPS survey spectra of CN and CN-210P.

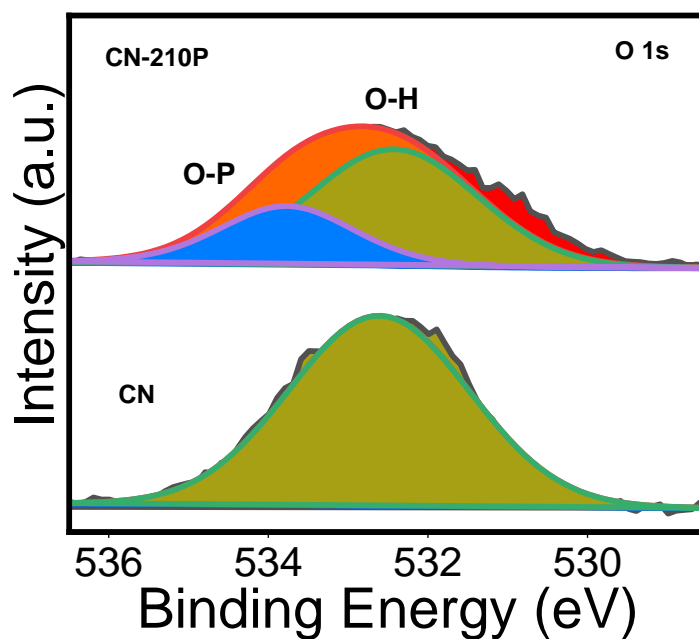

Fig. S3. XPS spectra corresponding to O1s core level for CN and CN-210P.

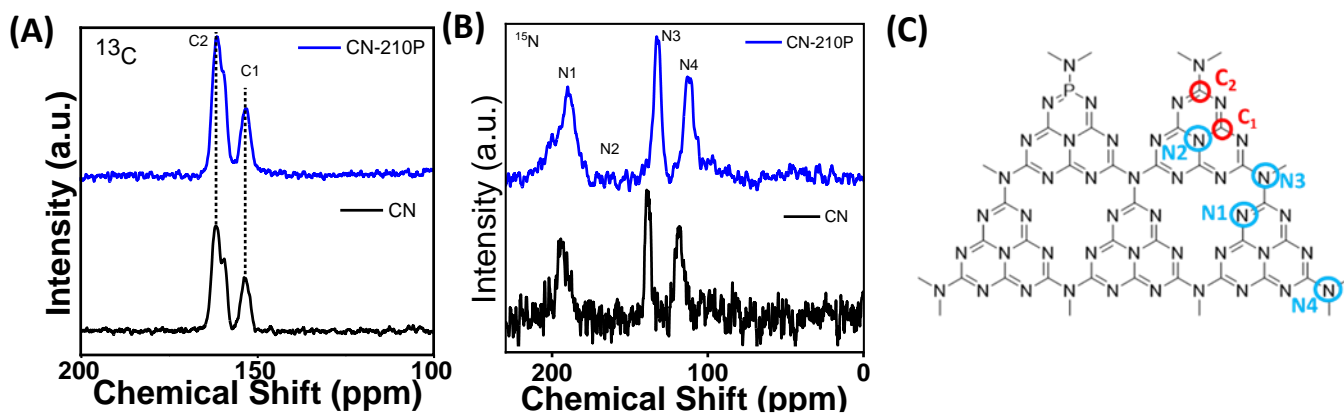

Fig. S4. CP-MAS SSNMR (A)  $^{13}\text{C}$  spectra and (B)  $^{15}\text{N}$  spectra of CN and CN-210P. (C) Schematic representation of g- $\text{C}_3\text{N}_4$  framework depicting different types of C and N atoms.

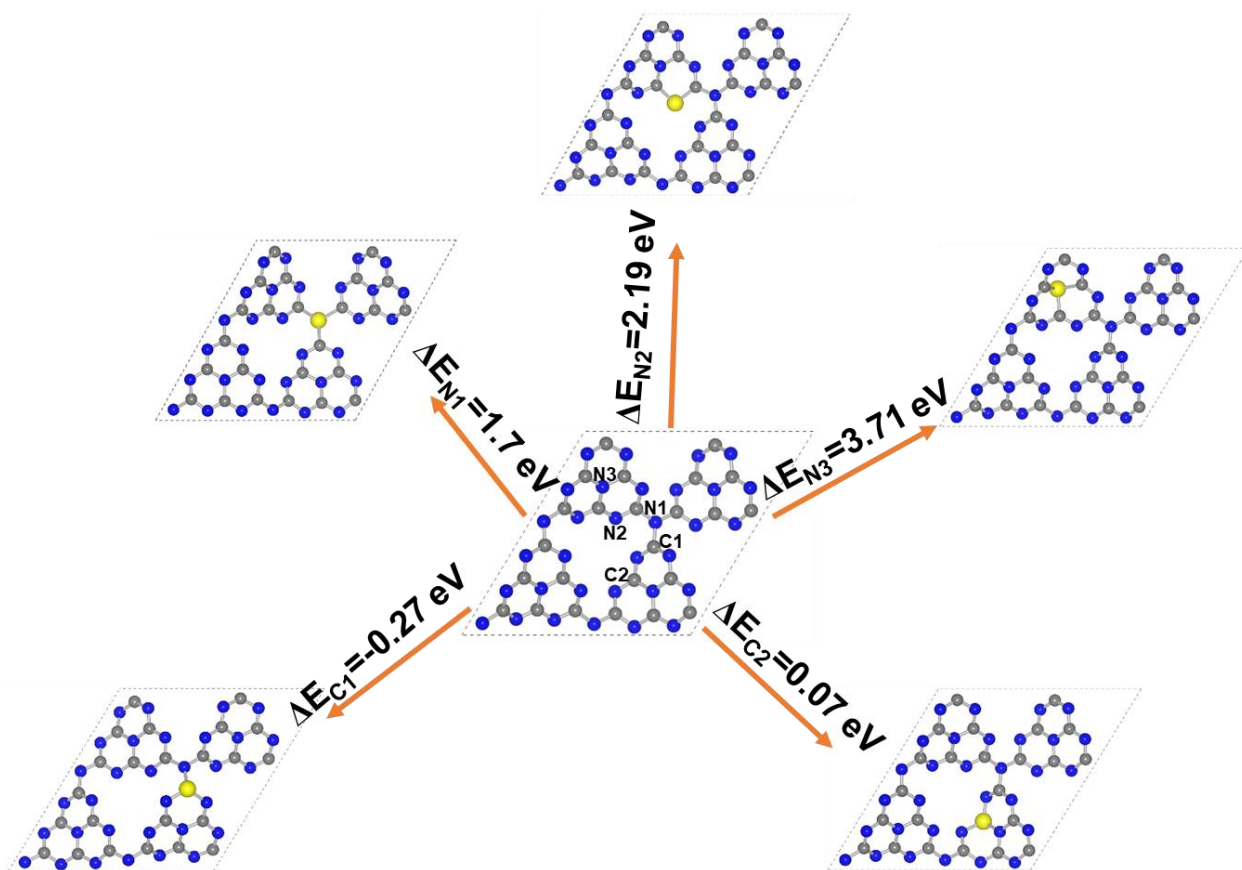

Fig. S5. Optimized structure of the 2 x 2 x 1 super cell of CN and its P-doped systems at different possible sites with the corresponding formation energies.

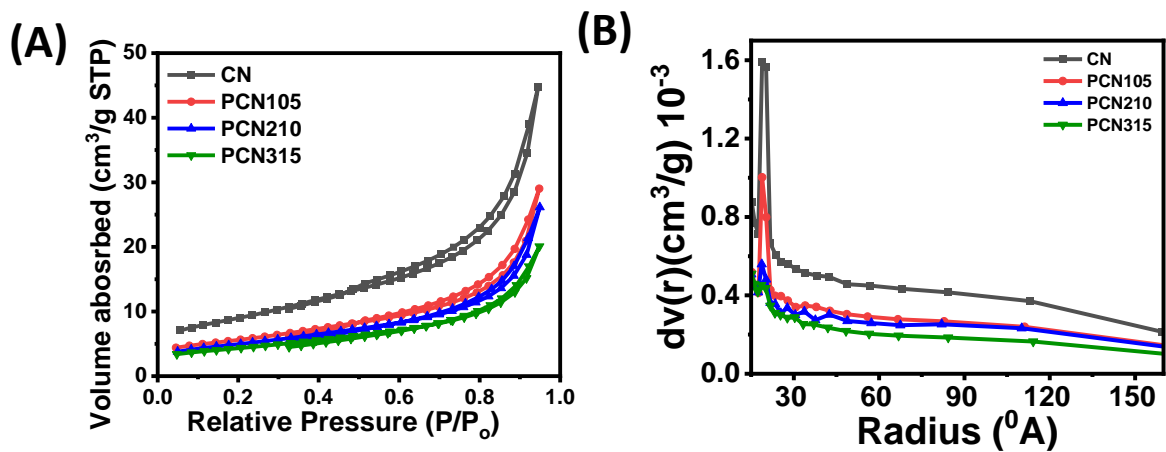

Fig. S6. (A) BET  $N_2$  adsorption-desorption isotherms, (B) Pore size distribution of CN and CN-xP respectively.

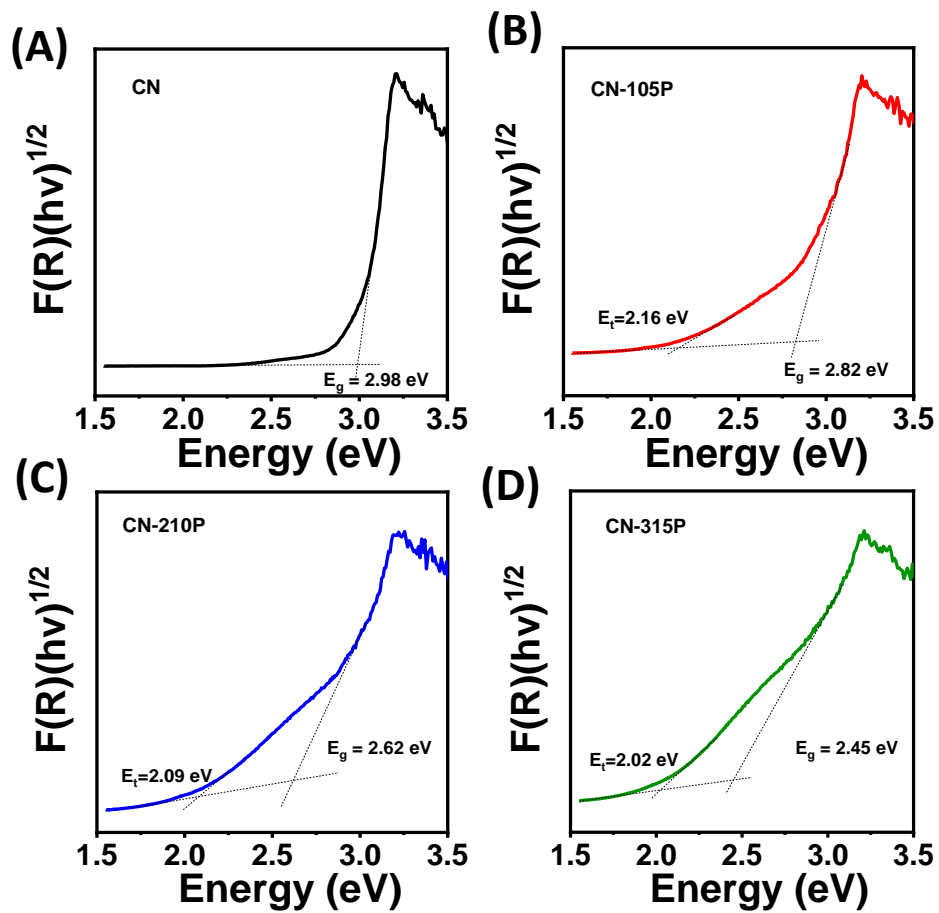

Fig. S7. Tauc Plot of (a) CN, (b) CN-105P, (c) CN-210P and (d) CN-315P.



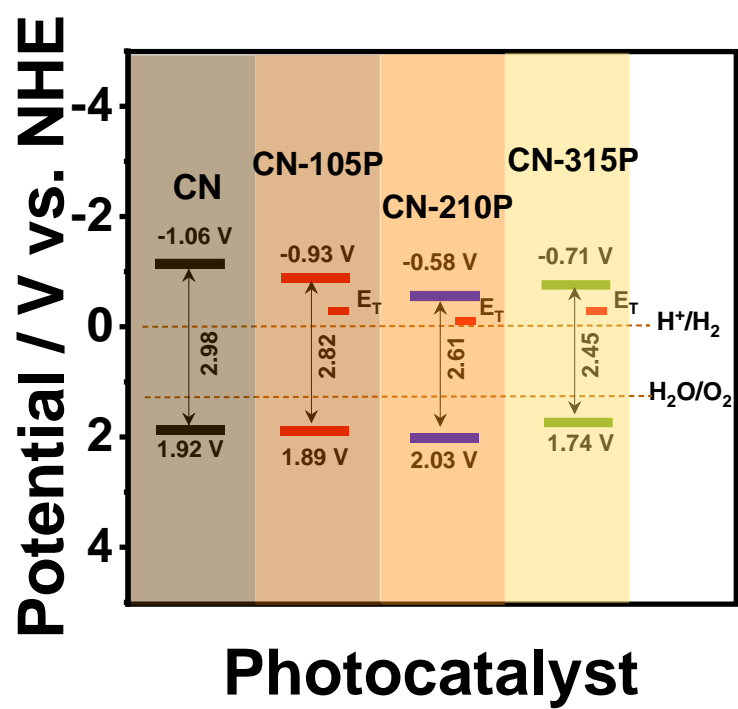

Fig. S8. The valence band (VB) and conduction band (CB) positions estimated from XPS VB spectra and UV-Vis DRS data.

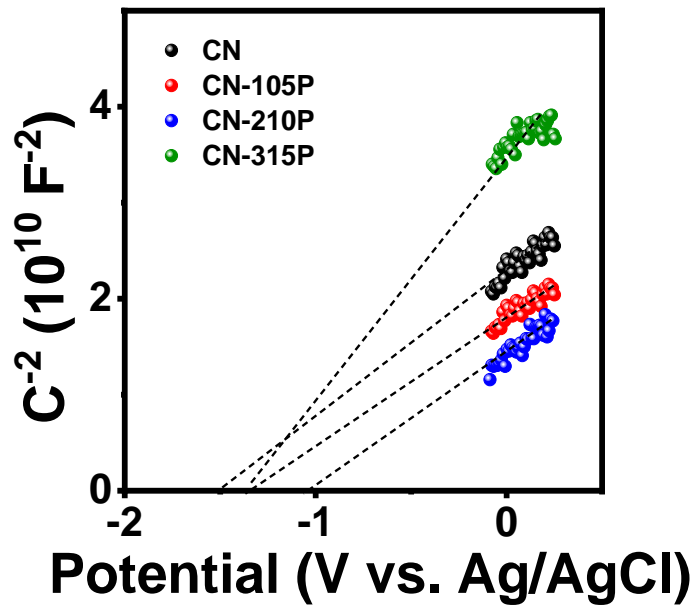

Fig. S9. Mott-Schottky plots of undoped and doped CN samples measured in 0.1 M Na<sub>2</sub>SO<sub>4</sub> (pH= 6.8) at 1000 Hz.

The flat band potential of CN and CN-xP were determined from the Mott-Schottky (M-S) measurements. The positive slope of the linear plot of M-S plot suggests that prepared samples are n-type semiconductors, as expected. The position of conduction band (CB)  $E_{CB}$  vs. RHE for all samples was calculated using the following equation.<sup>1</sup>

$$E_{CB}(RHE) = E_{Fb} + 0.059pH + E^0_{Ag/AgCl}$$

where  $E^0_{Ag/AgCl} = 0.198$  V vs. NHE,  $E_{Fb}$  is flat band potential obtained from Fig. S7 and pH of the electrolyte used was 6.8.

The conduction band minimum (CBM) of n-type semiconductors is assumed to be present at 0.1 V more negative than  $E_{fb}$ .<sup>1</sup> Subsequently, the obtained  $E_{CB}$  vs. RHE values are converted into  $E_{CB}$  vs. NHE scale.

The calculated  $E_{CB}$  (vs. NHE) values are given in Table S4.

According to the below equation, the position of valence band  $E_{VB}$  (vs. NHE) was determined using band gap value obtained from UV-DRS data and  $E_{CB}$  (vs. NHE) value obtained from M-S data.

$$E_{VB(NHE)} = E_g + E_{CB(NHE)}$$

where  $E_g$  is the band gap of the semiconductor,  $E_{VB}$  and  $E_{CB}$  are valence and conduction band positions respectively.

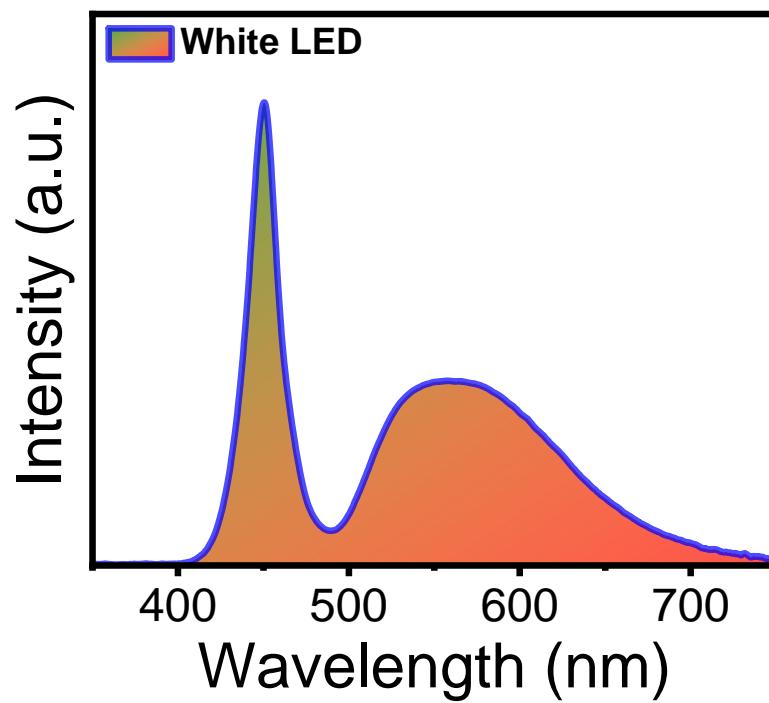

Fig. S10. Spectral output of the white LED used for photocatalysis in the present study.

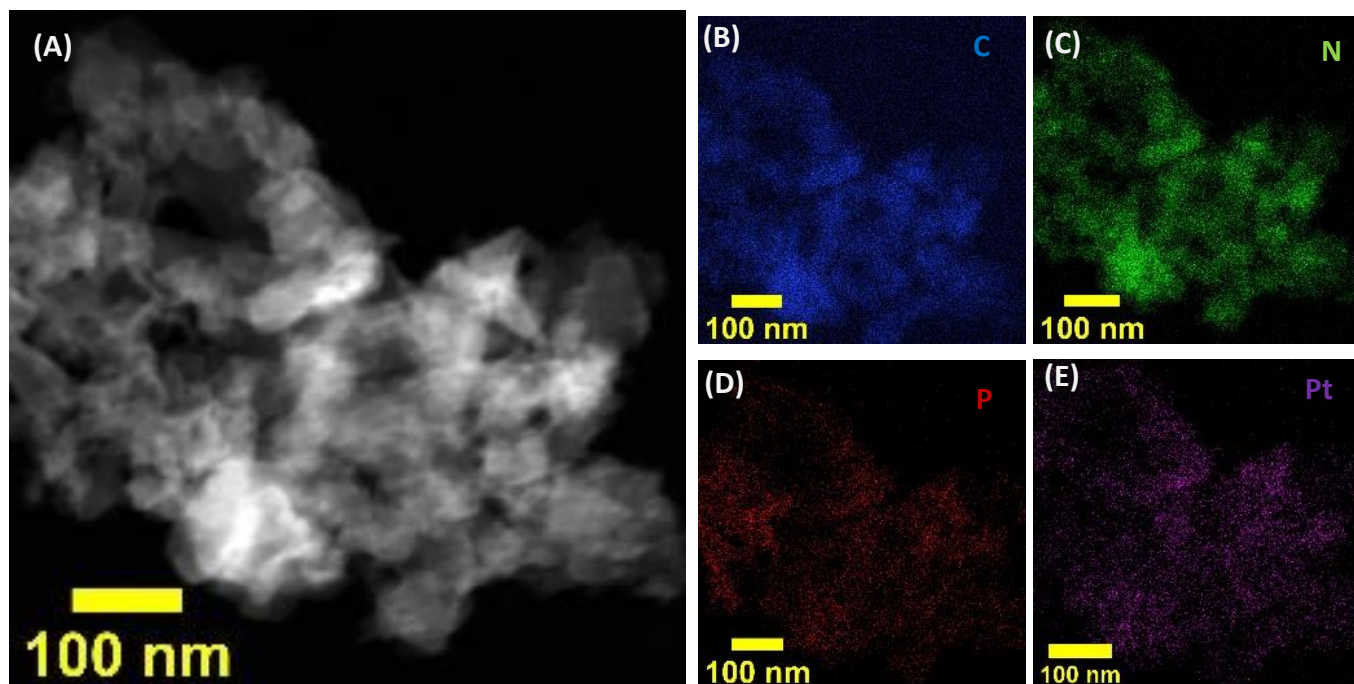

Fig. S11. (A) STEM-HAADF images of CN-210P modified with Pt co-catalysts. (B)-(E) STEM elemental mapping corresponding to C, N, P, and Pt respectively.

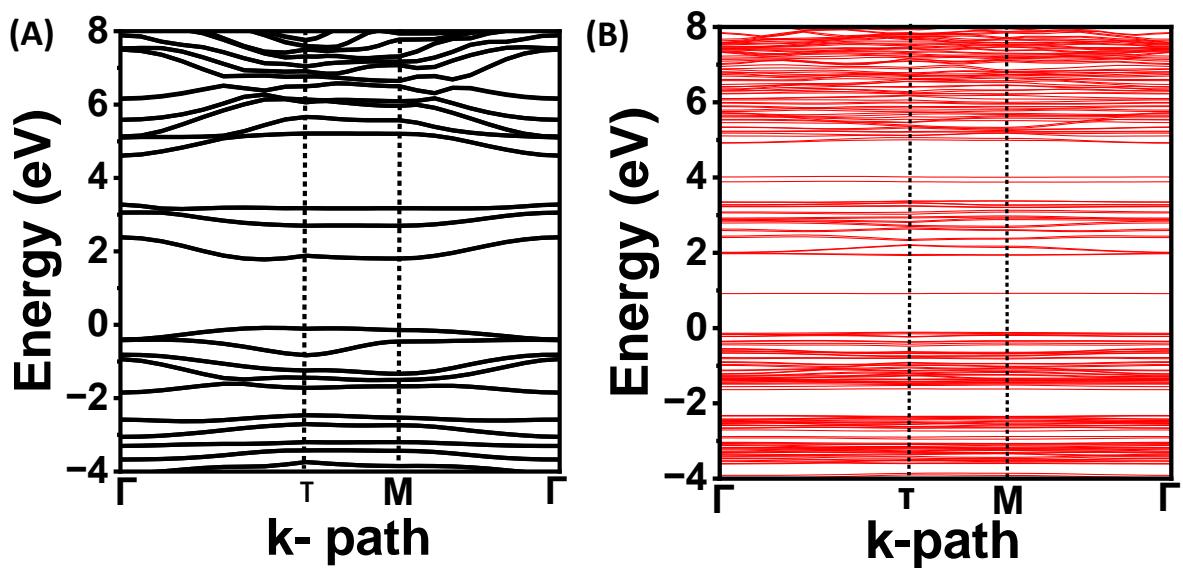

Fig. S12. Electronic band structure of (A) pure CN and (B) P-doped  $C_3N_4$  obtained from PBE functional.

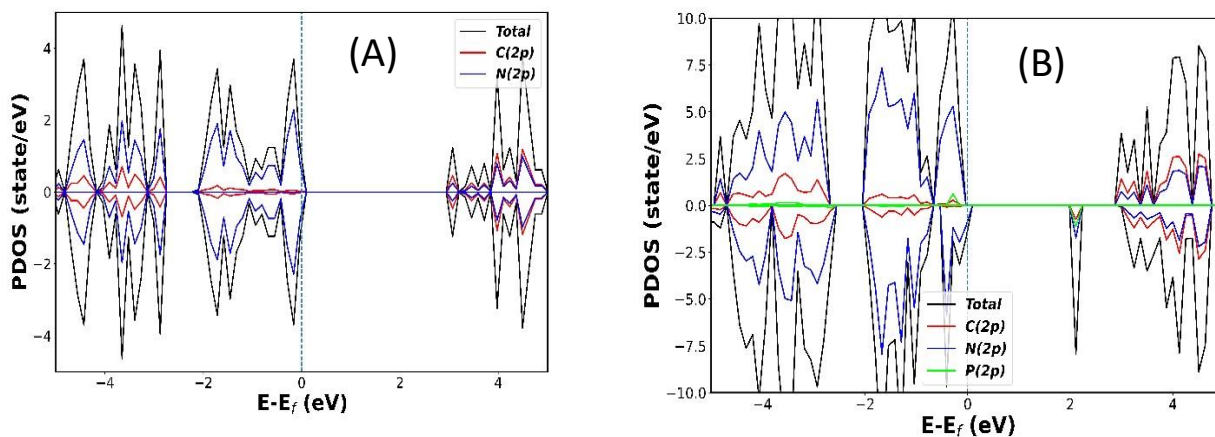

Fig. S13. Total and projected density of states of (A) CN and (B) P-doped  $C_3N_4$ .

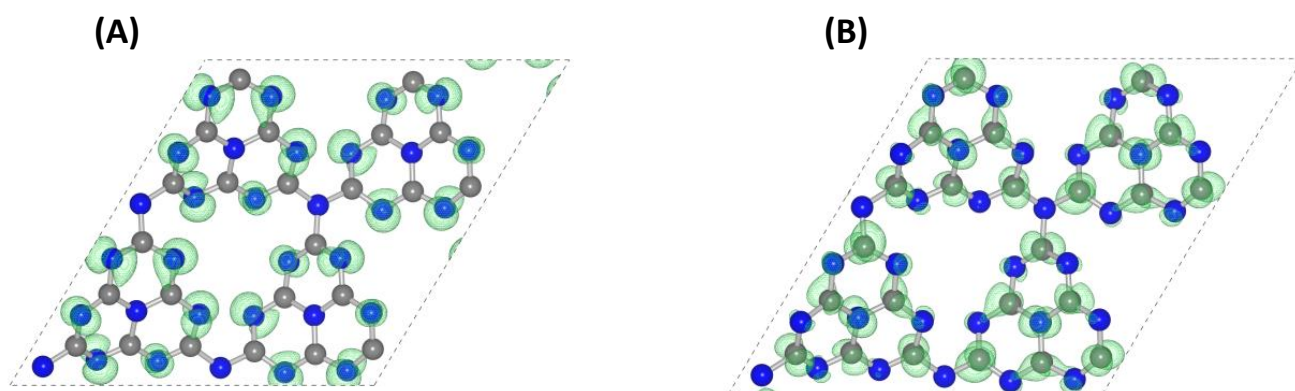

Fig. S14. Band decomposed charge density iso-surface plots of (a) valence band maxima and (b) conduction band minima of pure  $C_3N_4$ .

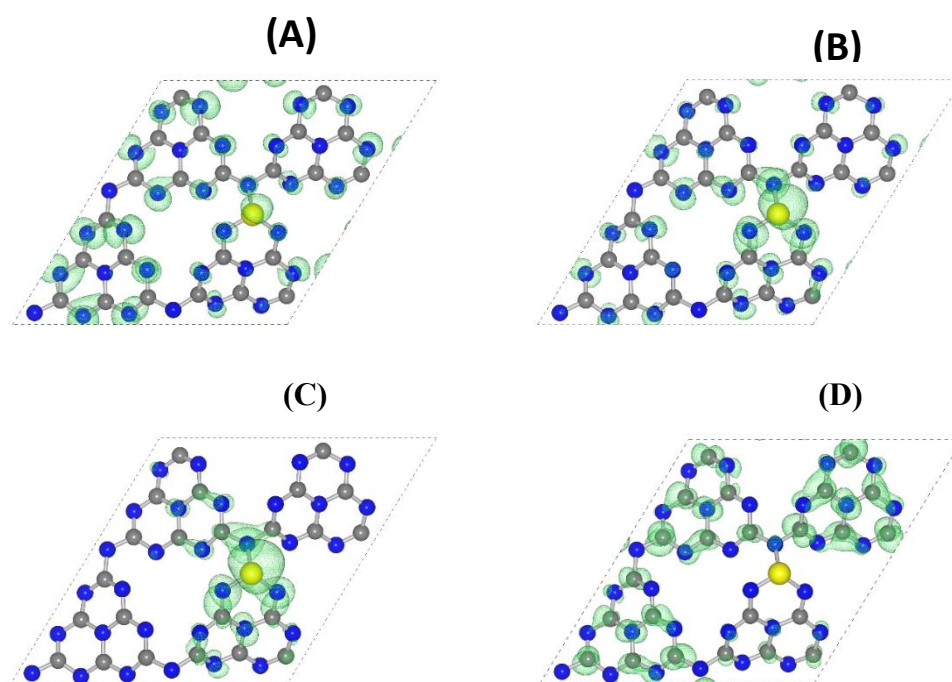

Fig. S15. Charge density iso-surface for the (A) highest fully occupied valence band (B) highest half-filled valence band (C) mid gap state and (D) conduction band minima.

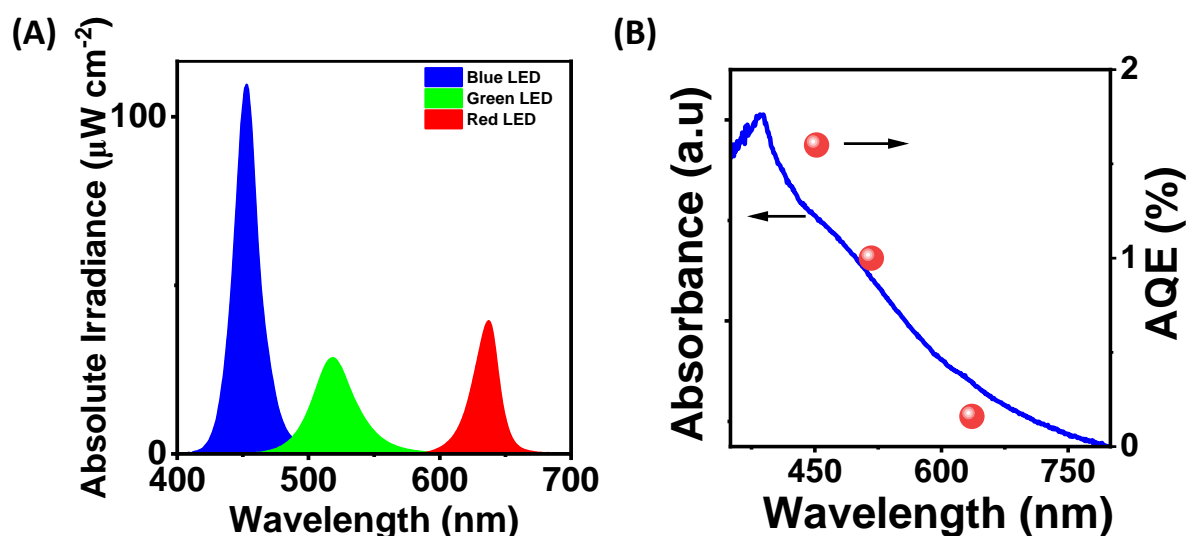

Fig. S16. (A) Spectra output of the LEDs used to determine apparent quantum efficiency (AQE), (B) UV-Vis DRS of CN-210P and AQE measured at different wavelength. Reaction condition: 10 mL water, 10 vol% TEOA, 10 mg CN-210P, Area of illumination is  $3 \text{ cm}^2$ .

Detailed calculation of AQY:

$$AQE (\%) = \frac{2 \times n_{H_2}}{n_{photons}} \times 100 = \frac{2 \times M \times N_A \times h \times c}{P \times S \times t \times \lambda_{incident}} \times 100$$

where  $n_{H_2}$  is the number of electrons transferred in  $H_2$  evolution,  $n_{photons}$  is the total number of incident photons,  $M$  is the amount of  $H_2$  in moles,  $N_A$  is the Avogadro number,  $h$  is the Planck's constant,  $c$  is the speed of light,  $S$  is the irradiation area,  $P$  is the intensity of irradiation light,  $t$  is the photoreaction time and  $\lambda$  is the wavelength of incident light.

For Blue light (452 nm)

$$AQE = \frac{2 \times 0.0367 \times 10^{-6} \text{ mol} \times 6.023 \times 10^{23} \text{ mol}^{-1} \times 6.623 \times 10^{-34} \text{ Js} \times 3 \times 10^8 \text{ ms}^{-1}}{109 \times 10^{-6} \text{ Wcm}^{-2} \times 3 \text{ cm}^2 \times 3600 \text{ s} \times 452 \times 10^{-9} \text{ m}} \times 100 = 1.65 \%$$

For Green light (517 nm)

$$AQE = \frac{2 \times 0.0047 \times 10^{-6} \text{ mol} \times 6.023 \times 10^{23} \text{ mol}^{-1} \times 6.623 \times 10^{-34} \text{ Js} \times 3 \times 10^8 \text{ ms}^{-1}}{20 \times 10^{-6} \text{ Wcm}^{-2} \times 3 \text{ cm}^2 \times 3600 \text{ s} \times 517 \times 10^{-9} \text{ m}} \times 100 = 1.00 \%$$

For Red light (636 nm)

$$AQE = \frac{2 \times 0.0019 \times 10^{-6} \text{ mol} \times 6.023 \times 10^{23} \text{ mol}^{-1} \times 6.623 \times 10^{-34} \text{ Js} \times 3 \times 10^8 \text{ ms}^{-1}}{39 \times 10^{-6} \text{ Wcm}^{-2} \times 3 \text{ cm}^2 \times 3600 \text{ s} \times 636 \times 10^{-9} \text{ m}} \times 100 = 0.16 \%$$

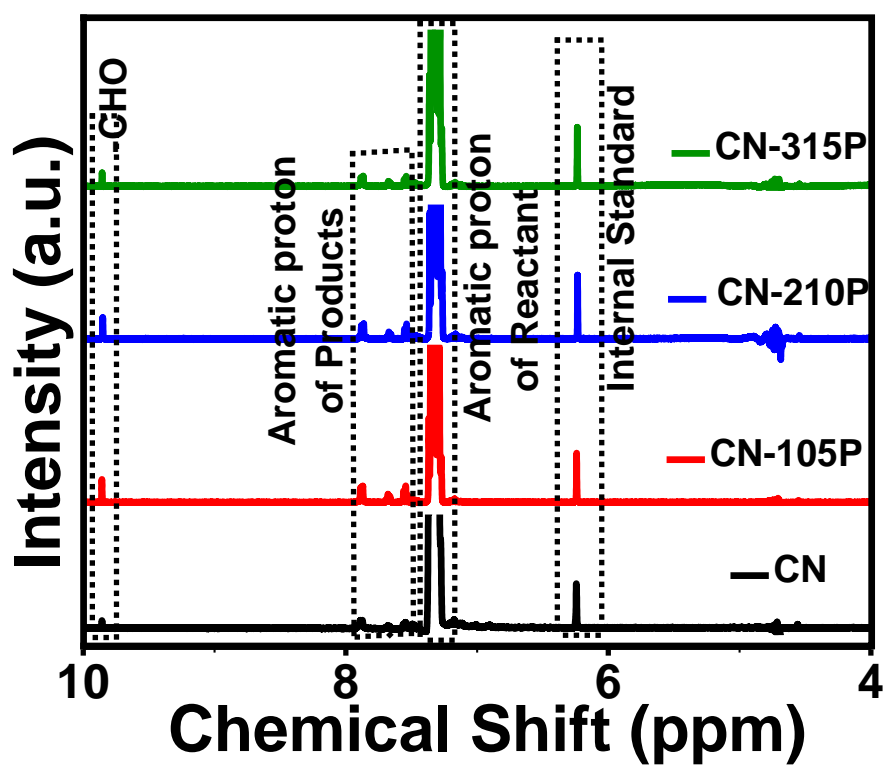

Fig. S17.  $^1\text{H}$  NMR spectra of the reaction mixture obtained after 7 h. of photocatalysis carried out with undoped and CN-xP.  $\text{D}_2\text{O}$  is used as a solvent, and 1 mM Maleic acid is used as an internal standard. Reaction conditions: 10 mg Catalyst, 20 mM BA in  $\text{H}_2\text{O}$ , illumination of white LED light for 7 h.



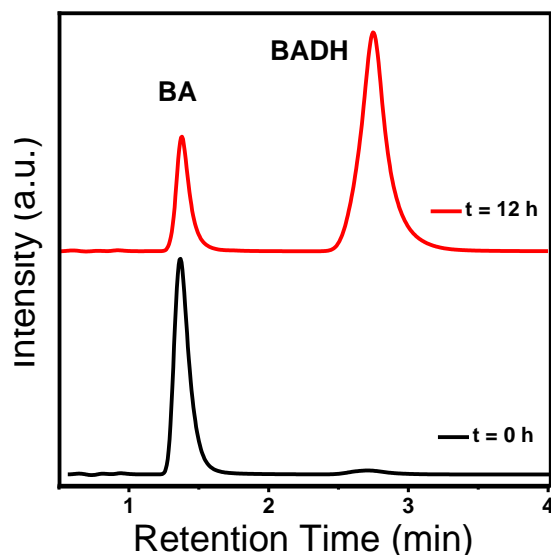

Fig. S18. LC data of the reaction mixture before and after 12 h. of the reaction, carried out using CN-210P as photocatalyst. Reaction conditions: 10 mg Catalyst, 20 mM BA in H<sub>2</sub>O, illumination of white LED light for 12 h.

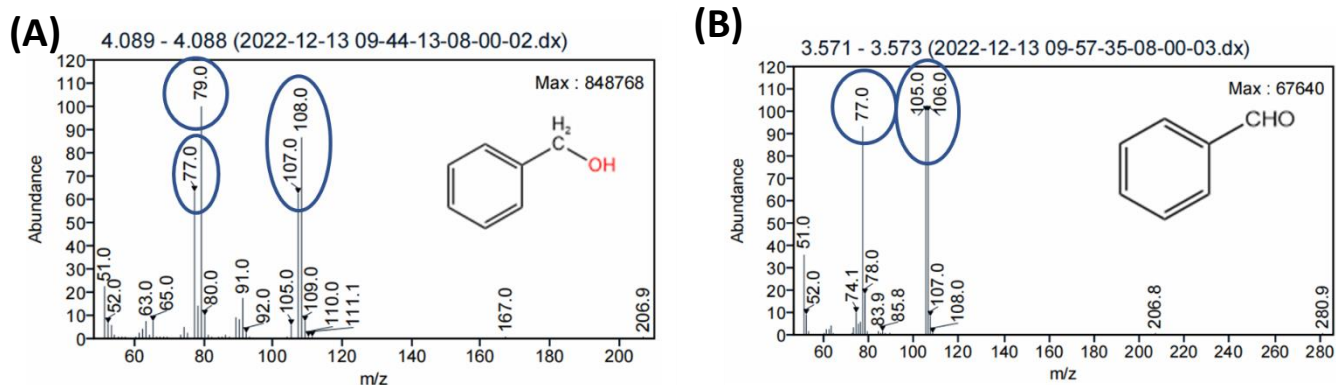

Fig. S19. (A) Mass spectra of the reaction mixture collected and extracted after illuminating the reaction mixture for 12 h. Reaction conditions: 10 mg Catalyst (CN-210P), 20 mM BA in H<sub>2</sub>O, illumination of white LED light for 12 h.

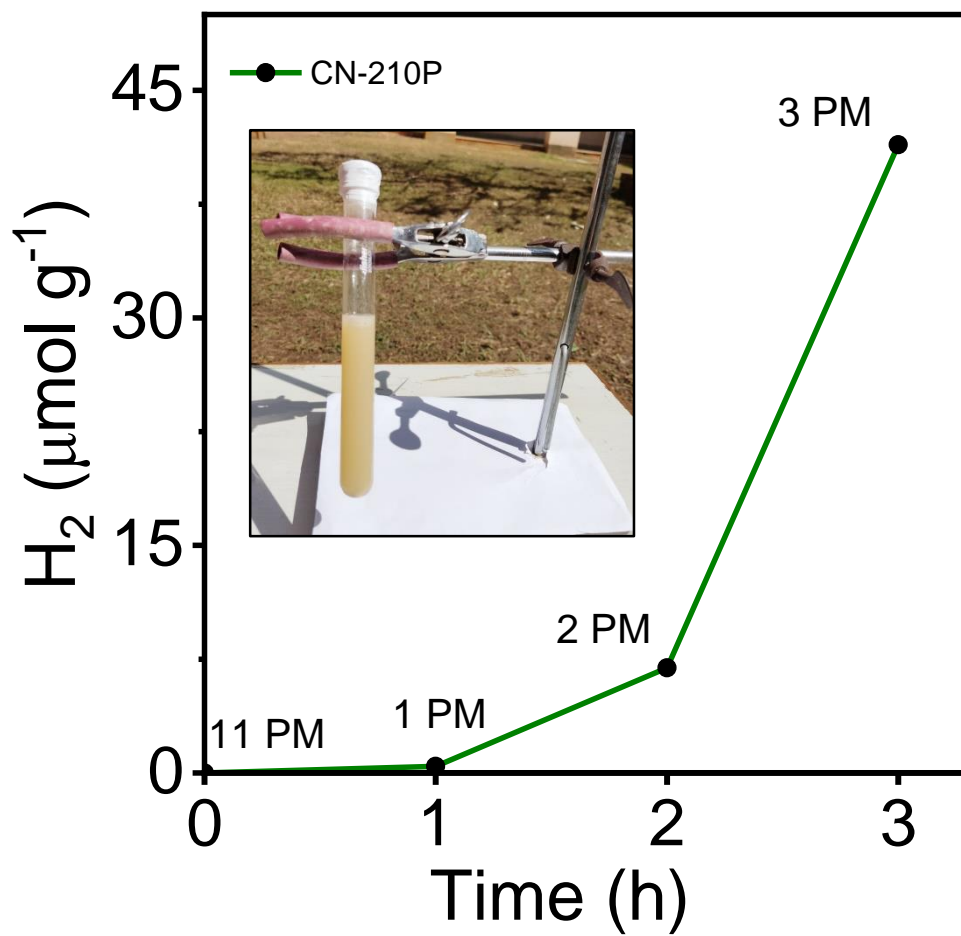

Fig. S20. Photocatalytic hydrogen evolution studies carried out under natural sunlight conditions. Inset shows picture depicting the experimental setup kept under natural sunlight. Reaction conditions: 10 mg of CN-210P, 20 mM BA in  $H_2O$ , carried out on 22<sup>nd</sup> Feb 2024 between 11-3 PM.

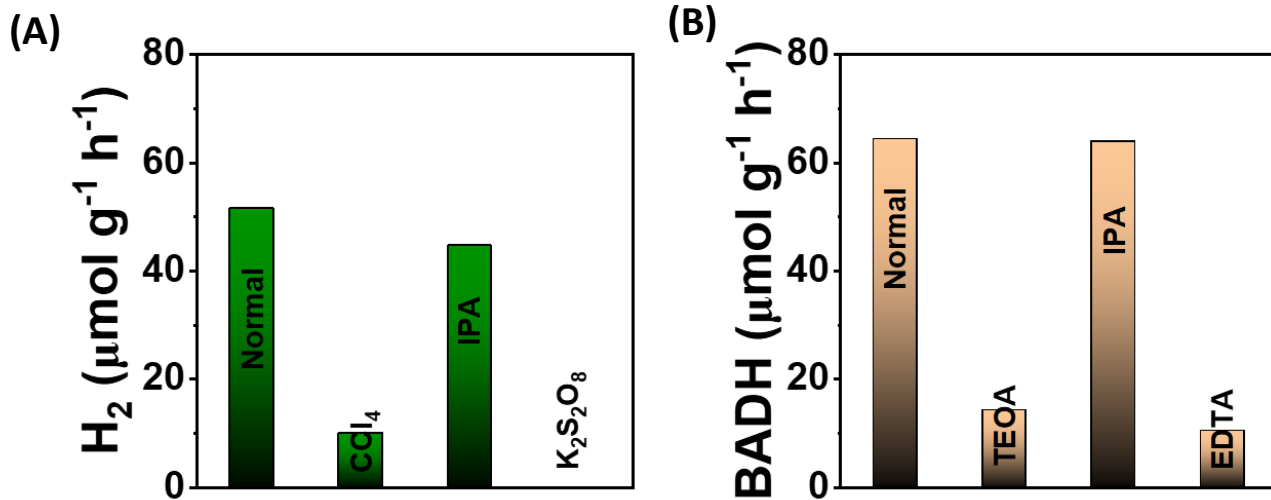

Fig. S21. Production of (A) H<sub>2</sub> and (B) BADH using CN-210P as photocatalyst. Normal Reaction conditions: 10 mg of CN-210P, 20 mM BA in H<sub>2</sub>O (Normal), illumination of white LED light for 6 h. Scavenger: 40 mM (IPA or EDTA or CCl<sub>4</sub> or K<sub>2</sub>S<sub>2</sub>O<sub>8</sub> or TEOA).

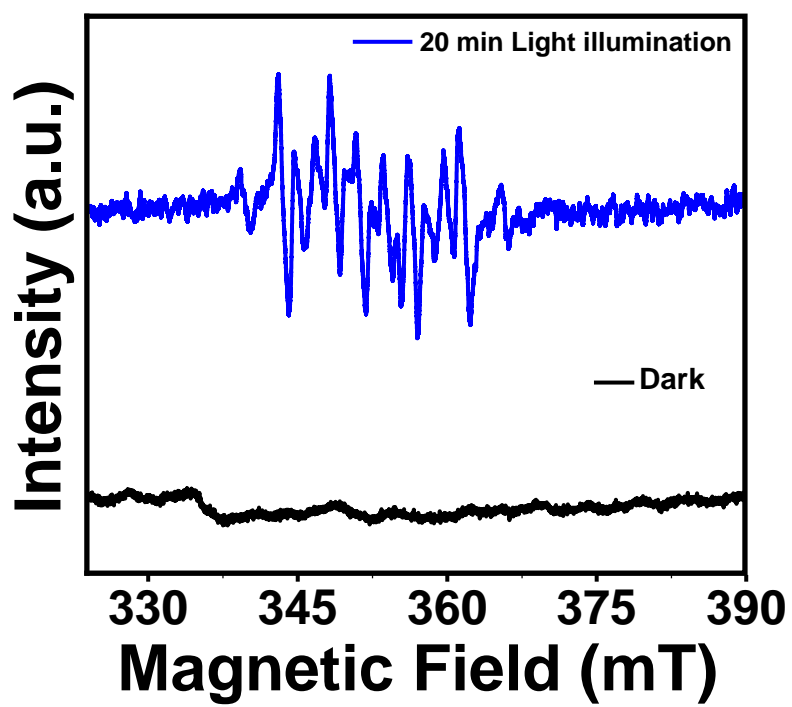

Fig. S22. ESR spectra recorded using DMPO-spin trapping agent in BA aqueous solution with or without light irradiation of light. Reaction conditions: 10 mg of CN-210P, 20 mM BA.

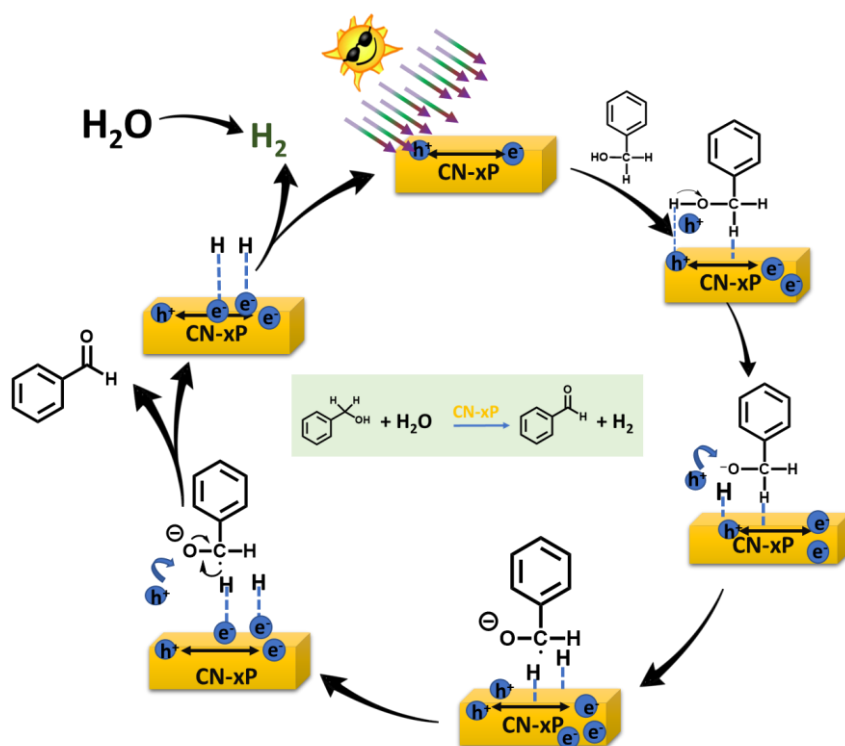

Fig. S23. Schematic representation of the proposed mechanism of the simultaneous production of BADH by selective oxidation of BA and  $H_2$  evolution in aqueous solution under oxygen-free conditions.

To understand the benzyl alcohol oxidation reaction, the reaction schemes were simulated as

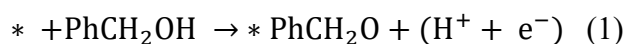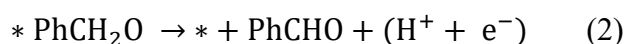

Reaction energies for these reactions were calculated for both pristine and P-doped g-C<sub>3</sub>N<sub>4</sub>. Energy of (H<sup>+</sup> + e<sup>-</sup>) is taken as the E(H<sub>2</sub>)/2 at standard hydrogen electrode conditions and zero pH from the computational hydrogen electrode model which has been extensively used for simulating the redox reactions. Optimized structures of all the reaction intermediates over pure and P-doped g-C<sub>3</sub>N<sub>4</sub> are reported in Fig. S24. The calculated reaction energies are plotted in Fig. S25. For the adsorption of each intermediate, different possible adsorption configurations were considered and the calculated the reaction energies are from the minimum energy structures. In both pure and P-doped systems, BA is found to interact with the catalyst surface through hydrogen bonding between the -OH group of BA and N-site of the catalyst. The calculated adsorption energy for BA is found to be -0.51 eV and -0.87 eV on pure and P-doped C<sub>3</sub>N<sub>4</sub> respectively. From the adsorbed BA, dehydrogenation by removing hydrogen from -CH<sub>2</sub>- and -OH groups are considered. In pure C<sub>3</sub>N<sub>4</sub>, removing the hydrogen from -CH<sub>2</sub>- group is found to be energetically preferred while in P-doped system, -OH hydrogen removal is preferred and the corresponding structures are shown in Fig. S24. In P-doped system, after removing the hydrogen of -OH group, the O-atom of PhCH<sub>2</sub>O is chemically bonded to the P-site of the catalyst with a P-O distance of 1.575 Å while in pure system, the adsorption of PhCHOH is found to be through hydrogen bonding. Further dehydrogenation step involves the removal of H from -CH<sub>2</sub> group in case of P-doped C<sub>3</sub>N<sub>4</sub> whereas it is from -OH group in case of pristine C<sub>3</sub>N<sub>4</sub>, which leads to the formation of BADH. From the free energy plots shown in Fig. S25, the overpotential for the oxidation reaction of BA to BADH is expected to be lower in P-doped C<sub>3</sub>N<sub>4</sub> as compared to that in the pure C<sub>3</sub>N<sub>4</sub>.

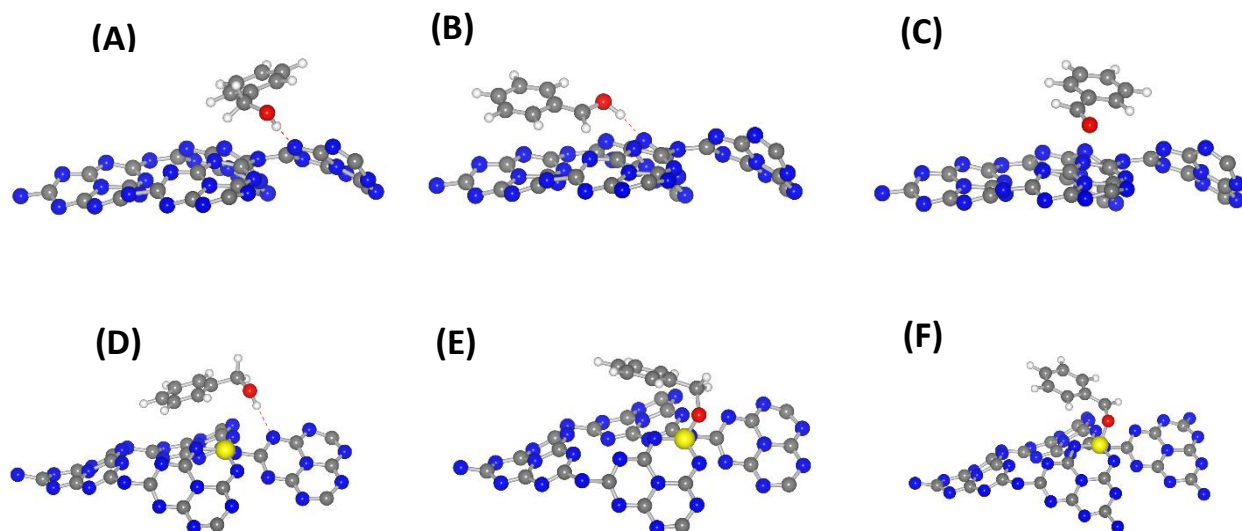

Fig. S24. Optimized structures of different reaction intermediates involved in BA oxidation over pristine  $C_3N_4$  (A-C) and P-doped  $C_3N_4$  (D-F).

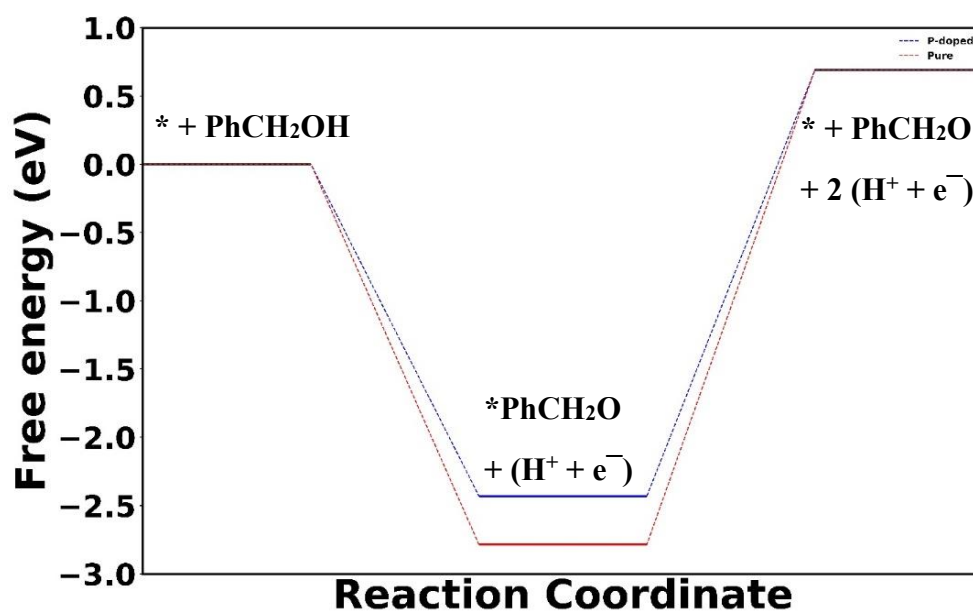

Fig. S25. Reaction energy profile for the BA oxidation over pure and P-doped g- $C_3N_4$ .

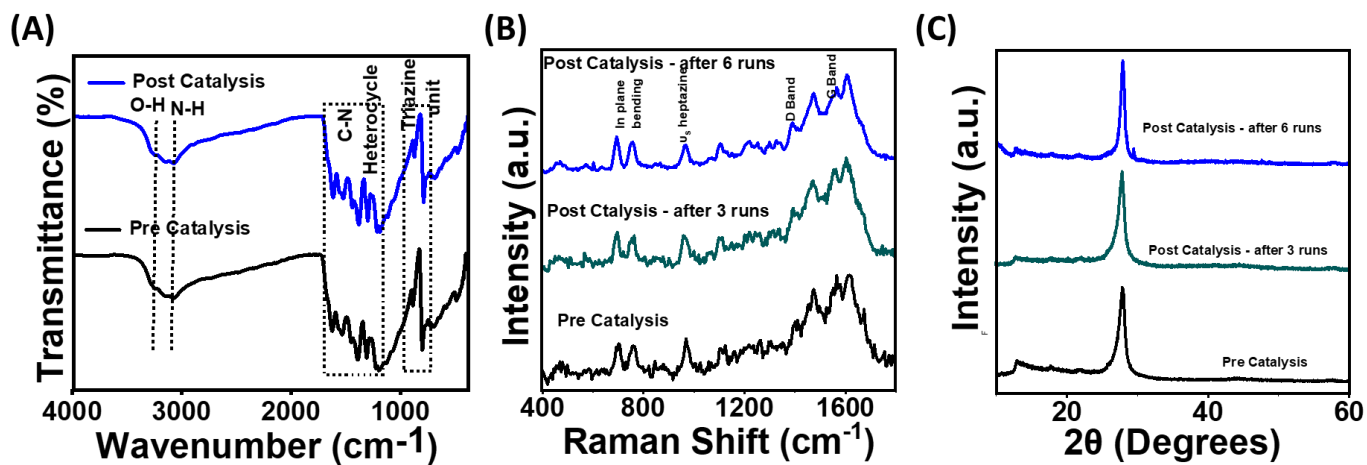

Fig. S26. (A) FTIR, (B) Raman spectra, (C) XRD patterns recorded for CN-210P before and after photocatalysis.



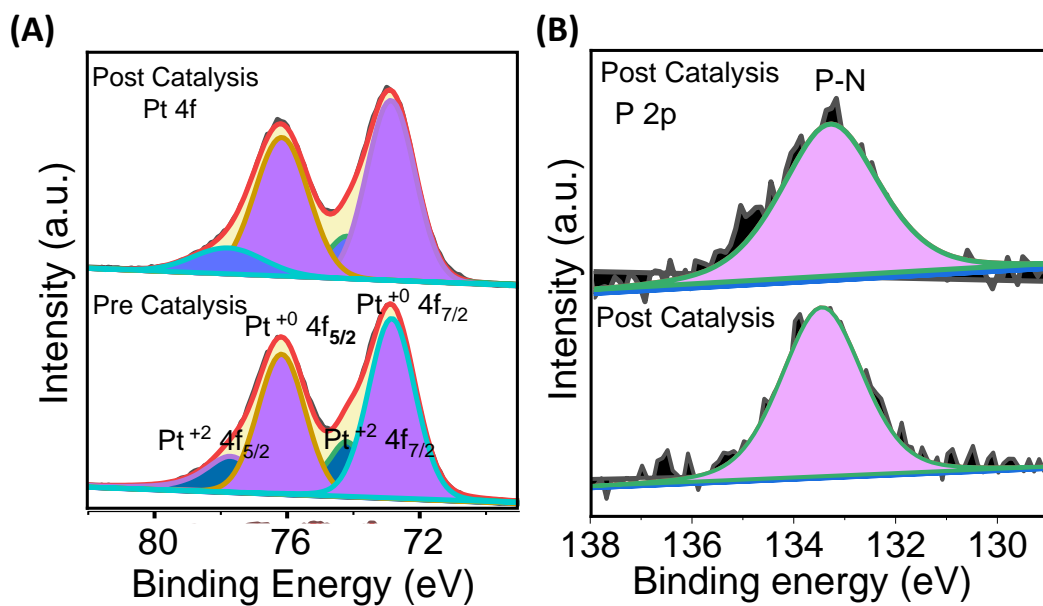

Fig. S27. XPS data of (A) Pt 4f and (B) P 2p core levels for PtCN-210P before and after photocatalysis.

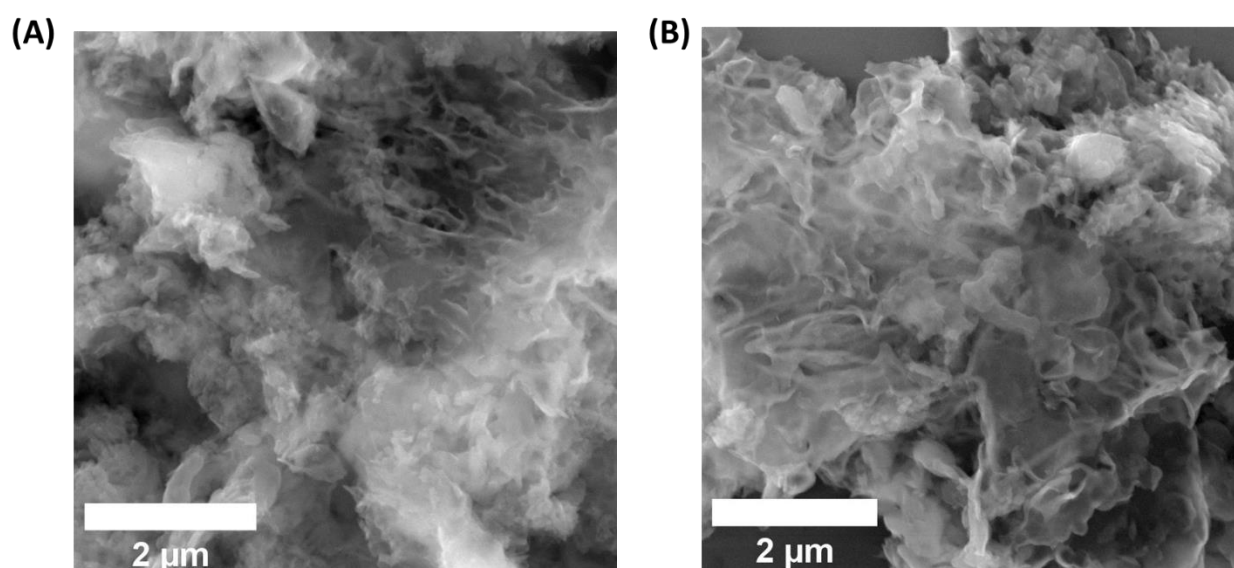

Fig. 28. FESEM images of PtCN-210P after (A) 3 runs and (B) 6 runs of photocatalysis.

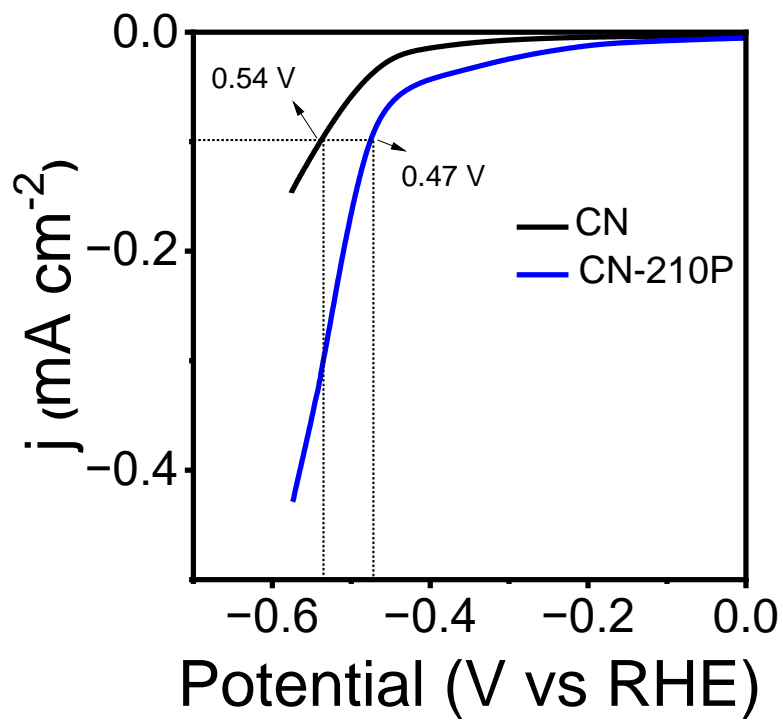

Fig. S29. LSV plot recorded using CN and CN-210P modified FTO at a scan rate of 5 mV/s in deaerated 0.1 M  $\text{Na}_2\text{SO}_4$  (pH = 6.8).

Table S1. Comparison of  $I_D/I_G$  value of various CN-xP

| Catalyst | $I_D/I_G$ |
|----------|-----------|
| CN       | 0.90      |
| CN-105P  | 0.93      |
| CN-210P  | 0.98      |
| CN-315P  | 0.97      |

Table S2: Summary of the percentage elemental composition pristine and CN-xP samples obtained from CHNS analysis.

| Catalyst | N Area | C Area | S Area | N %   | C %   | H %   | Molar ratio C/N |
|----------|--------|--------|--------|-------|-------|-------|-----------------|
| CN       | 36.251 | 14.453 | 2.175  | 41.51 | 23.61 | 1.108 | 0.663           |
| CN-105P  | 49.995 | 20.309 | 3.743  | 58.62 | 34.02 | 1.990 | 0.677           |
| CN-210P  | 48.833 | 19.595 | 3.021  | 59.25 | 33.97 | 1.658 | 0.669           |
| CN-315P  | 54.387 | 21.721 | 4.016  | 61.61 | 35.18 | 2.066 | 0.666           |

Table S3: Specific surface area, total pore volume and average pore size of undoped and CN-xP samples obtained from BET measurements.

| Catalyst | Surface area ( $m^2/g$ ) | Total pore volume ( $cm^3/g$ ) | Average pore size (nm) |
|----------|--------------------------|--------------------------------|------------------------|
| CN       | 32.834                   | 7.124e-02                      | 43.39                  |
| CN-105P  | 20.201                   | 4.608e-02                      | 45.62                  |
| CN-210P  | 18.275                   | 4.223e-02                      | 46.21                  |
| CN-315P  | 15.889                   | 3.278e-02                      | 41.26                  |

Table S4: Summary of parameters for undoped and CN-xP obtained from Mott-Schottky measurements.

|         | $E_g^*$ | $E_{fb}$ (V vs. Ag/AgCl) | $E_{fb}$ (V vs. RHE) | CB (V vs. NHE) | VB (V vs. NHE) |
|---------|---------|--------------------------|----------------------|----------------|----------------|
| CN      | 2.98    | -1.5                     | -0.91                | -1.01          | 1.98           |
| CN-105P | 2.82    | -1.35                    | -0.72                | -0.82          | 1.99           |
| CN-210P | 2.61    | -1.07                    | -0.47                | -0.57          | 2.04           |
| CN-315P | 2.45    | -1.28                    | -0.68                | -0.78          | 1.67           |

\* Value obtained from UV-Vis DRS.

Table S5: Summary of parameters for undoped and CN-xP obtained from VB-XPS measurements.

|         | $E_g^*$ | VB-XPS | CB (V vs. NHE) | VB (V vs. NHE) |
|---------|---------|--------|----------------|----------------|
| CN      | 2.98    | 2.15   | -1.06          | 1.92           |
| CN-105P | 2.82    | 2.12   | -0.93          | 1.89           |
| CN-210P | 2.61    | 2.26   | -0.58          | 2.03           |
| CN-315P | 2.45    | 1.97   | -0.71          | 1.74           |

\* Value obtained from UV-Vis DRS.

Table S6. Comparison of the photocatalytic H<sub>2</sub> production activities of the g-C<sub>3</sub>N<sub>4</sub> based systems with a sacrificial electron donor.

| S. No | Catalyst                                             | Sacrificial agent   | Pt (wt. %) | H <sub>2</sub> (μmol g <sup>-1</sup> h <sup>-1</sup> ) | Light source                | Reference                         |
|-------|------------------------------------------------------|---------------------|------------|--------------------------------------------------------|-----------------------------|-----------------------------------|
| 1     | I-g-C <sub>3</sub> N <sub>4</sub>                    | 10 vol% TEOA        | 3          | 760                                                    | 300 W Xe lamp<br>λ ≥ 420 nm | 10.1002/adma.201303611            |
| 2     | Br-modified g-C <sub>3</sub> N <sub>4</sub>          | 10 vol% TEOA        | 3          | 960                                                    | 300 W Xe lamp               | 10.1016/j.apcatb.2016.03.062      |
| 3     | Ultrathin g-C <sub>3</sub> N <sub>4</sub> nanosheets | 10 vol% TEOA        | 3          |                                                        | 300 W Xe lamp               | 10.1039/C6RA26172H                |
| 4     | Quasi-sphere g-C <sub>3</sub> N <sub>4</sub>         | 20 vol% TEOA        | 3          | 613.4                                                  | 300 W Xe lamp<br>λ ≥ 420 nm | 10.1016/j.apcatb.2018.07.017      |
| 5     | Ni-doped g-C <sub>3</sub> N <sub>4</sub>             | 10 vol% TEOA        | 3          | 155.71                                                 | 300 W Xe lamp               | 10.1039/C9TA04559G                |
| 6     | P-doped g-C <sub>3</sub> N <sub>4</sub>              | 10 vol% TEOA        | 3          | 506                                                    | 300 W Xe lamp               | 10.1039/C4TA05292G                |
| 7     | P-doped g-C <sub>3</sub> N <sub>4</sub> nanobelts    | 10 vol% TEOA        | 3          | 46.3                                                   | 300 W Xe lamp<br>λ ≥ 400 nm | 10.1016/j.apcatb.2019.11793<br>1  |
| 8     | P-doped g-C <sub>3</sub> N <sub>4</sub>              | 10 vol% TEOA        | 1          |                                                        | 300 W Xe lamp<br>λ ≥ 420 nm | 10.1016/j.apcatb.2018.10.044      |
| 9     | P-doped carbon nitride nanotubes                     | 10 vol% TEOA        | 3          | 145.8                                                  | 300 W Xe lamp               | 10.1016/j.carbon.2023.03.03<br>8  |
| 10    | U-CN-N                                               | 10 vol% TEOA        | 3          | 130                                                    | 300 W Xe lamp               | 10.1016/j.apcatb.2017.06.067      |
| 11    | 3D g-C <sub>3</sub> N <sub>4</sub> NR                | 10 vol% TEOA        | 1          | 600                                                    | 300 W Xenon lamp            | 10.1016/j.apcatb.2019.11776<br>1  |
| 12    | PCNS-2                                               | 10 Vol% TEOA        | 1          | 366                                                    | 300 W Xenon lamp            | 10.1021/acssuschemeng.7b0<br>0559 |
| 13    | PCN-S                                                | 10 Vol% TEOA        | 1          | 318                                                    | 300 W Xenon lamp            | 10.1016/j.cjche.2020.06.037       |
| 14    | CN-SP                                                | 20 mL Methanol      | 1          | 570                                                    | 300 W Xenon lamp            | 10.1016/j.apcatb.2017.07.022      |
| 15    | <b>PCN210</b>                                        | <b>10 vol% TEOA</b> | <b>1.5</b> | <b>1089</b>                                            | <b>White LED</b>            | <b>Present Study</b>              |

Table S7: Comparison of the Apparent Quantum Yield

| S.No | Photocatalyst                            | Pt (wt%)   | Wavelength (nm) | Scavenger            | AQE (%)     | Reference                        |
|------|------------------------------------------|------------|-----------------|----------------------|-------------|----------------------------------|
| 1    | BP NSs                                   | 5          | 500             | 10 Vol% TEOA         | 0.5         | 10.1016/j.ijhydene.2019.06.087   |
| 2    | P-doped g-C <sub>3</sub> N <sub>4</sub>  | 3          | 435             | 10 Vol% TEOA         | 0.7         | 10.1039/C4TA05292G               |
| 3    | CNS-Pt-B                                 | 1          | 420             | 10 Vol% TEOA         | 0.6         | 10.1021/acssuschemeng.8b01835    |
| 4    | Sr-TiO <sub>2</sub>                      | 1 mg Pt/mL | 470             | 10 Vol% TEOA         | 0.67        | 10.1016/j.jphotochem.2020.112705 |
| 5    | PtSA-CN6201                              | 1.72       | 420             | 10 Vol% TEOA         | 0.17        | 10.1016/j.nanoen.2018.11.033     |
| 6    | sg-CN-PTZ                                | 2          | 415             | 10 Vol% TEOA         | 0.32        | 10.1002/cssc.202002500           |
|      |                                          |            | 440             | 10 Vol% TEOA         | 0.25        | 10.1002/cssc.202002500           |
| 7    | RuCat/Pt-g-C <sub>3</sub> N <sub>4</sub> | 1          | 400             | 100 mM MBA           | 0.28        | 10.1016/j.apcatb.2017.11.072     |
| 8    | <b>CN-210P</b>                           | <b>1.5</b> | <b>450</b>      | <b>10 Vol% TEOA</b>  | <b>1.6</b>  | <b>This work</b>                 |
| 9    | <b>CN-210P</b>                           | <b>1.5</b> | <b>520</b>      | <b>10 vol % TEOA</b> | <b>1.01</b> | <b>This work</b>                 |
| 10   | <b>CN-210P</b>                           | <b>1.5</b> | <b>630</b>      | <b>10 vol % TEOA</b> | <b>0.16</b> | <b>This work</b>                 |
| 11   | <b>CN-210P</b>                           | <b>1.5</b> | <b>450</b>      | <b>20 mM BAOH</b>    | <b>0.34</b> | <b>This work</b>                 |

Table S8: Summary of photoluminescence (PL) average decay time ( $\tau$ ) determined from time-resolved PL (TRPL) measurements.

| Sample  | $\tau_1$ (ns) | $\tau_2$ (ns) | A <sub>1</sub> (%) | A <sub>2</sub> (%) | R <sup>2</sup> | Average decay time ( $\tau$ ) (ns) |
|---------|---------------|---------------|--------------------|--------------------|----------------|------------------------------------|
| CN      | 3.29          | 15.5          | 56.00              | 43.99              | 0.998          | 8.65                               |
| CN-105P | 2.36          | 10.6          | 62.72              | 37.27              | 0.997          | 5.44                               |
| CN-210P | 1.92          | 7.65          | 57.52              | 42.47              | 0.999          | 4.35                               |
| CN-315P | 1.56          | 8.73          | 68.73              | 31.26              | 0.997          | 4.01                               |

#### References

1. S. Ding, J. B. Gabriel Filho, T. Peppel, S. Haida, J. Rabeah, N. Steinfeldt and J. Strunk, *Sustain. Energy Fuels*, 2023, **7**, 4396–4400.
